# Supplementary material for: A supramolecular artificial light-harvesting system based on a luminescent platinum(ii) metallacage
Source: Royal Society of Chemistry journal article supplement (doi:10.1039/d3dt01706k), 2023-01-01
Supplement: d3dt01706k1.pdf [file d3dt01706k1.pdf]

Supporting Information

**A Supramolecular Artificial Light-Harvesting System Based on a  
Luminescent Platinum(II) Metallacage**

Ning Wang,<sup>a</sup> Weiao Yang,<sup>a</sup> Lei Feng,<sup>a</sup> Xing-Dong Xu<sup>\*a</sup> and Shengyu Feng<sup>\*a</sup>

<sup>a</sup> Key Laboratory of Special Functional Aggregated Materials of Ministry of Education, Shandong Key Laboratory of Advanced Silicone Materials and Technology, School of Chemistry and Chemical Engineering, National Engineering Research Center for Colloidal Materials, Shandong University, Jinan 250100, Shandong, China.

E-mail: xuxd@sdu.edu.cn; fsy@sdu.edu.cn

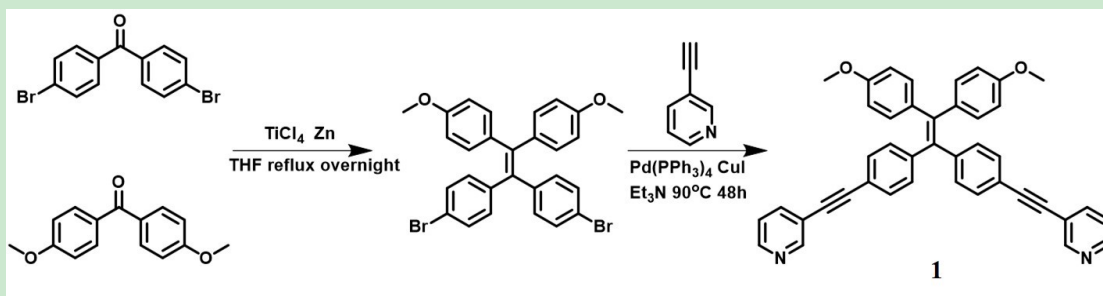

Scheme S1. Synthetic route to ligand 1.

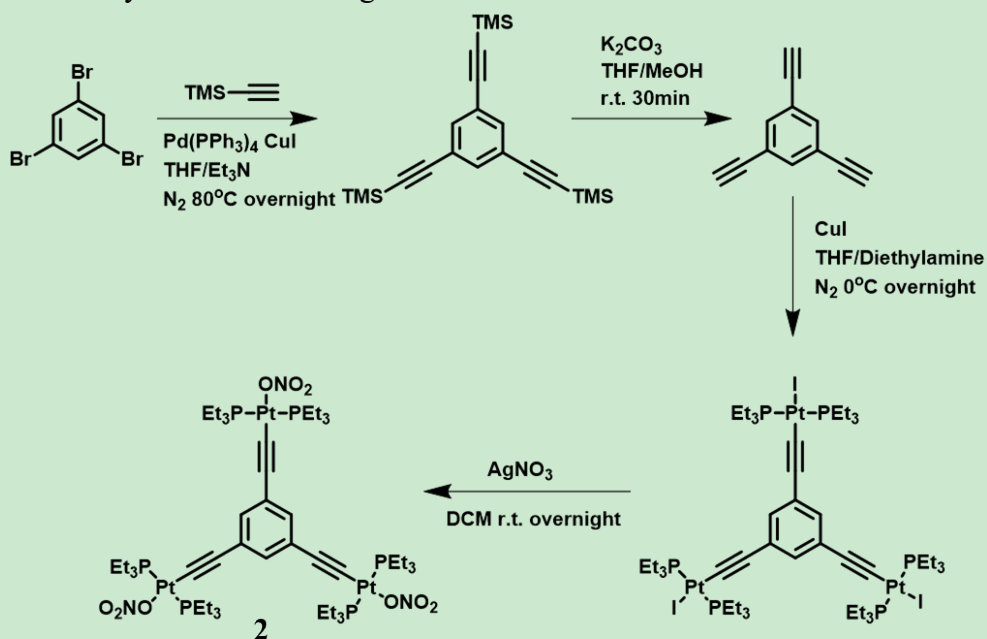

Scheme S2. Synthetic route to acceptor 2.

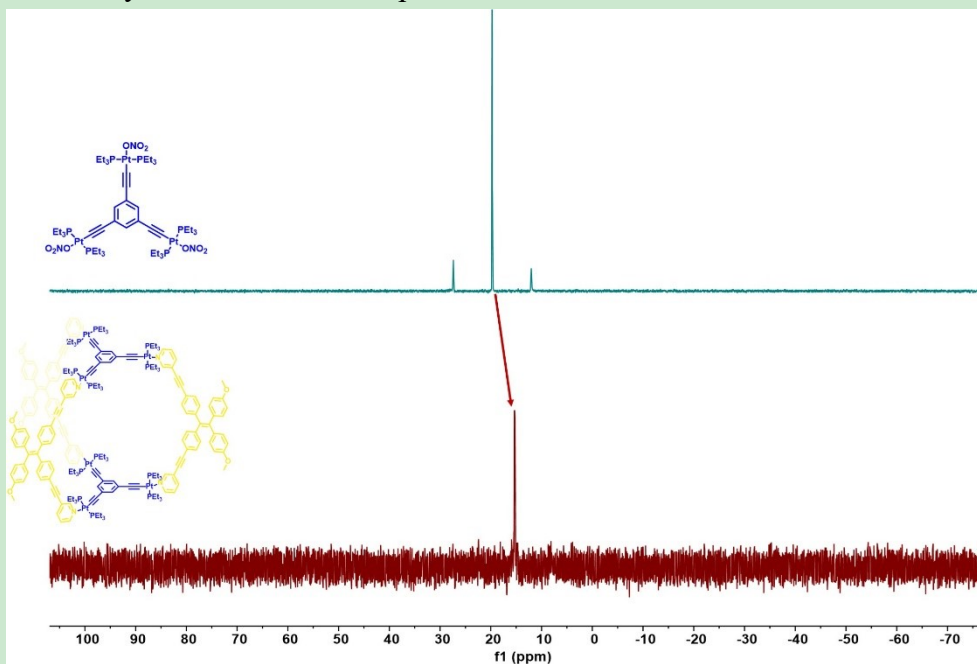

Figure S1. The  $^{31}\text{P}$  NMR spectra (162 MHz, Acetone- $d_6$ ) of organometallic Pt(II) acceptor 2 (up) and metallacage 3 (bottom)

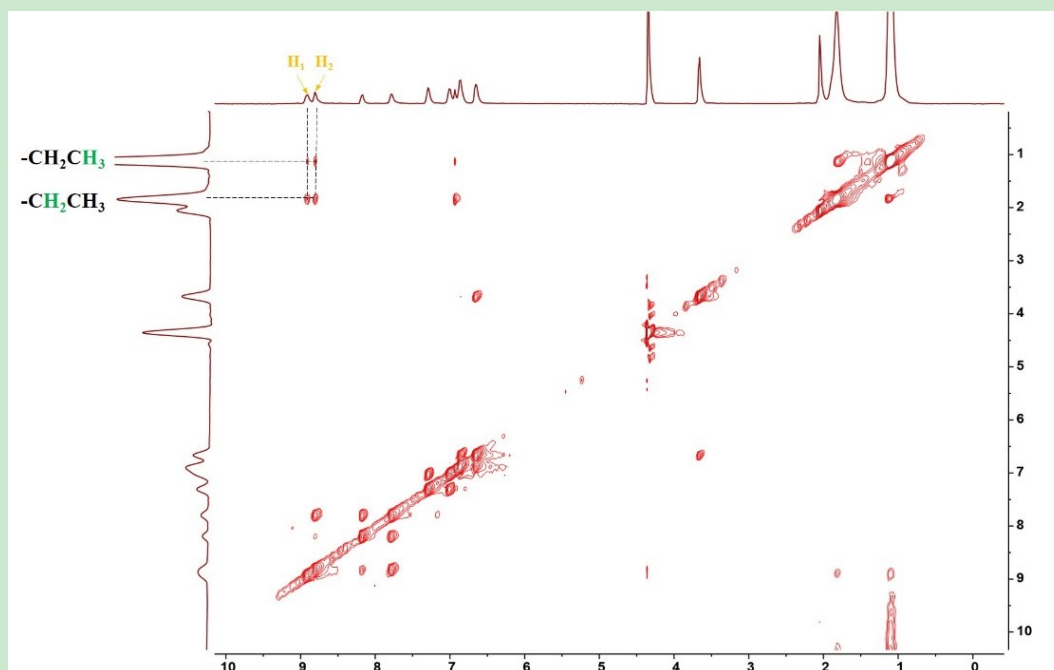

**Figure S2** The NOESY spectrum (400 MHz, Acetone- $d_6$ ) of metallacage **3**.

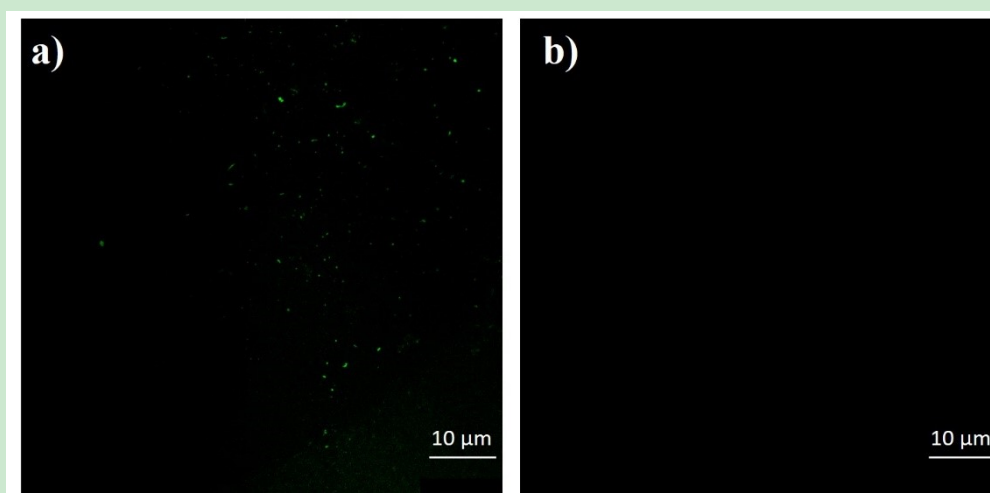

**Figure S3.** CLSM images of metallacage **3** (a), NiR (b) in acetone/water (1/9, v/v) mixtures (20  $\mu$ M,  $\lambda_{\text{ex}}$  = 405nm)

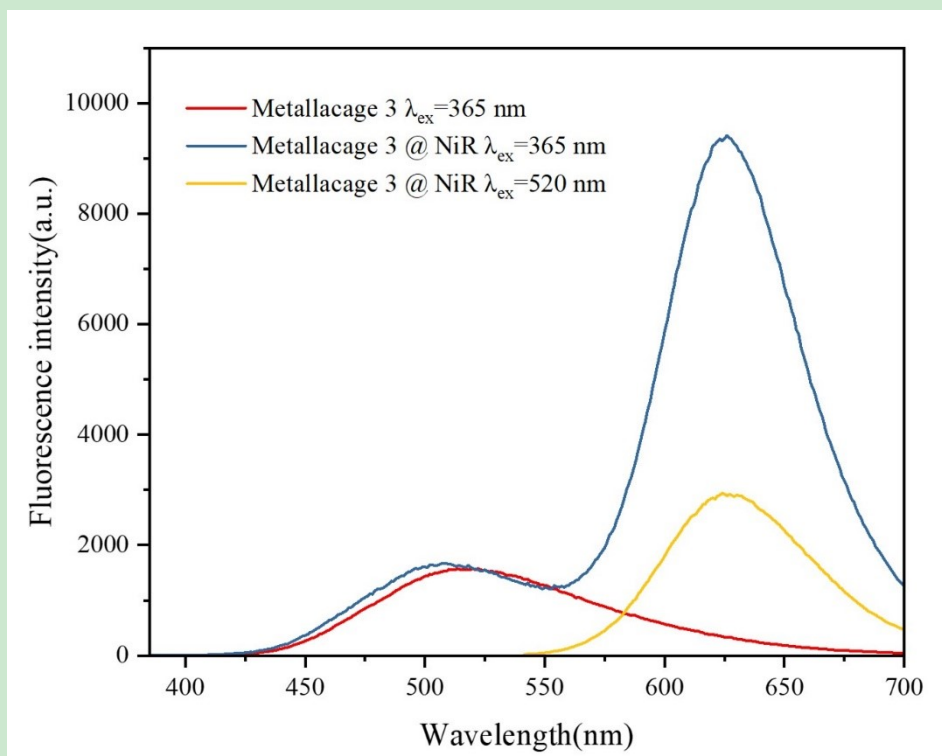

**Figure S4.** Fluorescence emission spectra of metallacage **3** (red line,  $\lambda_{\text{ex}}=365$  nm), metallacage **3** @ NiR (blue line,  $\lambda_{\text{ex}}=365$  nm) and metallacage **3** @ NiR (yellow line,  $\lambda_{\text{ex}}=365$  nm); the red line normalized according to the intensity at 520 nm of the blue line.

**Calculation of energy transfer efficiency ( $\Phi_{\text{ET}}$ ):** Energy transfer efficiency was calculated based on the following equation.

$$\phi_{\text{ET}} = 1 - I_{\text{DA}}/I_{\text{D}}$$

where  $I_{\text{DA}}$  and  $I_{\text{D}}$  are the emission intensity of metallacage **3** @ NiR and **3**, respectively ( $\lambda_{\text{ex}}=365$  nm,  $\lambda_{\text{em}}=520$  nm).

**Calculation of Antenna effect:** Antenna effect was calculated based on the following equation.

$$\text{Antenna effect} = \frac{I_{A+D(365\text{ nm})}^{630\text{ nm}} - I_{D(365\text{ nm})}^{630\text{ nm}}}{I_{A+D(520\text{ nm})}^{630\text{ nm}}}$$

where  $I_{A+D(365\text{ nm})}^{630\text{ nm}}$  and  $I_{A+D(520\text{ nm})}^{630\text{ nm}}$  are the fluorescence intensities of the metallacage **3** @ NiR at 630 nm under excitation at 365 nm and 520 nm, respectively.  $I_{A(365\text{ nm})}^{630\text{ nm}}$  represents the fluorescence intensity of metallacage **3** at 630 nm under excitation at 365

nm after normalization of the emission spectrum of **3 @ NiR** according to the intensity of **3 @ NiR** located at 520 nm.

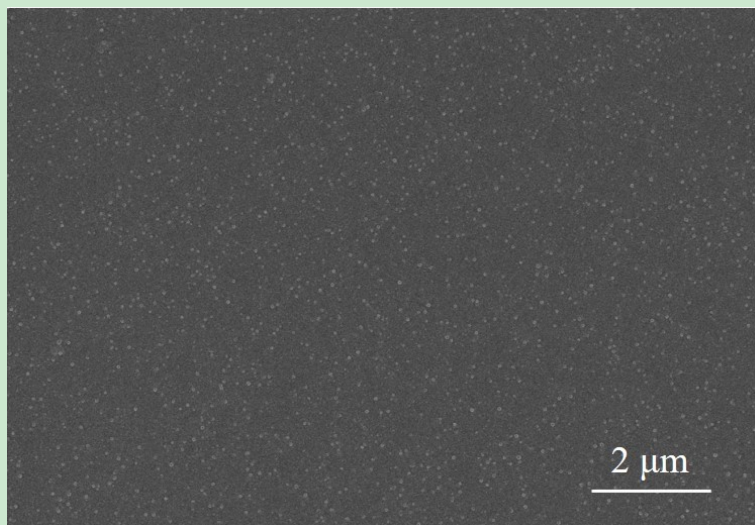

**Figure S5.** SEM images of the aggregates of the metallacage **M3** in acetone/water (1/9, v/v) mixtures.

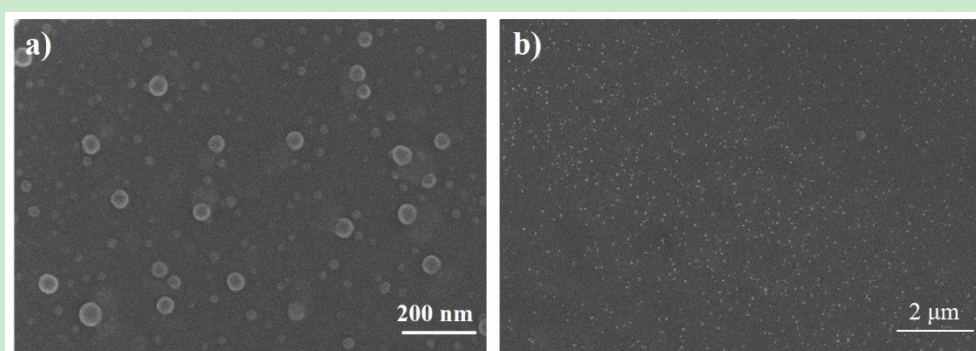

**Figure S6.** SEM images of the aggregates of the metallacage **M3 @ NiR** in acetone/water (1/9, v/v) mixtures.

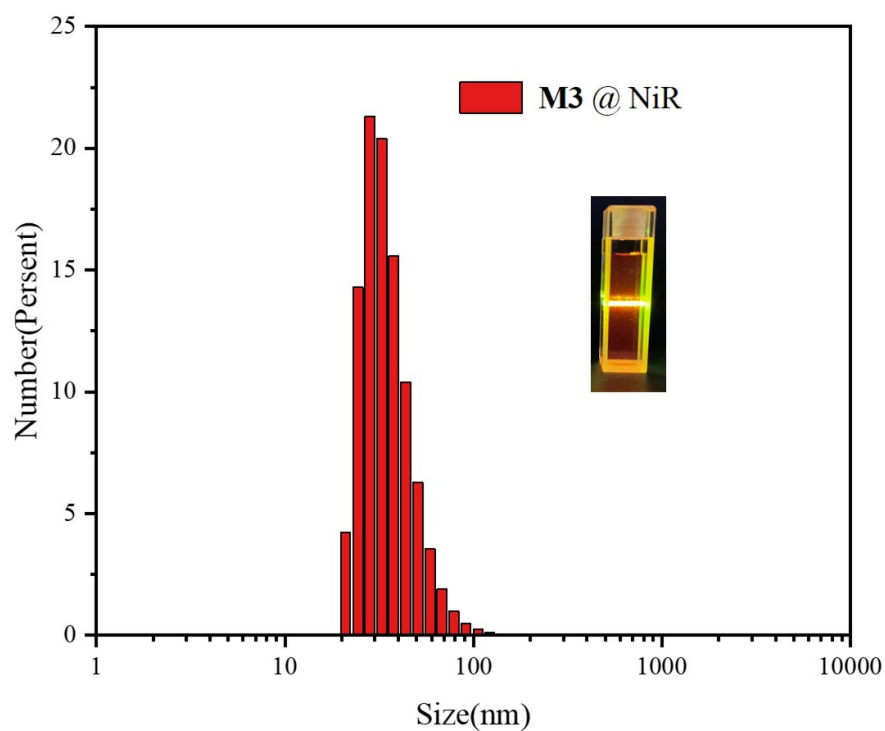

**Figure S7.** DLS data of metallacage **3 @ NiR** in acetone/water (1/9, v/v) mixtures; Inset: Tyndall effect of and **3 @ NiR** in acetone/water (1/9, v/v).

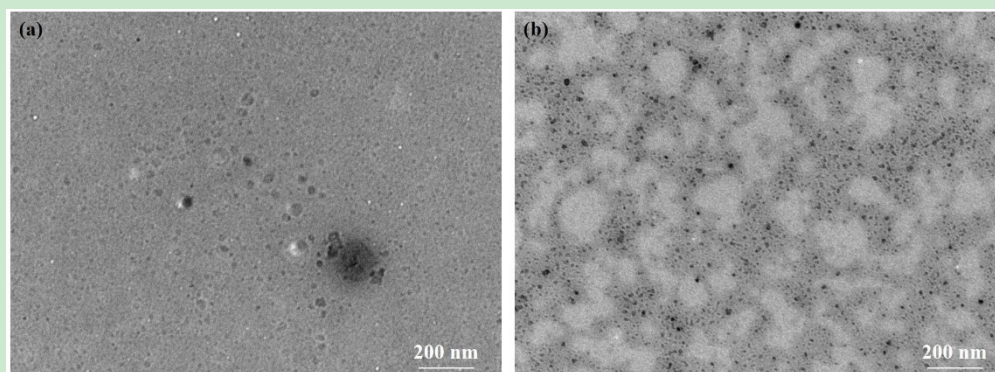

**Figure S8.** TEM images of the aggregates of the metallacage **M3** (a) and **M3 @ NiR** (b) in acetone/water (1/9, v/v) mixtures.

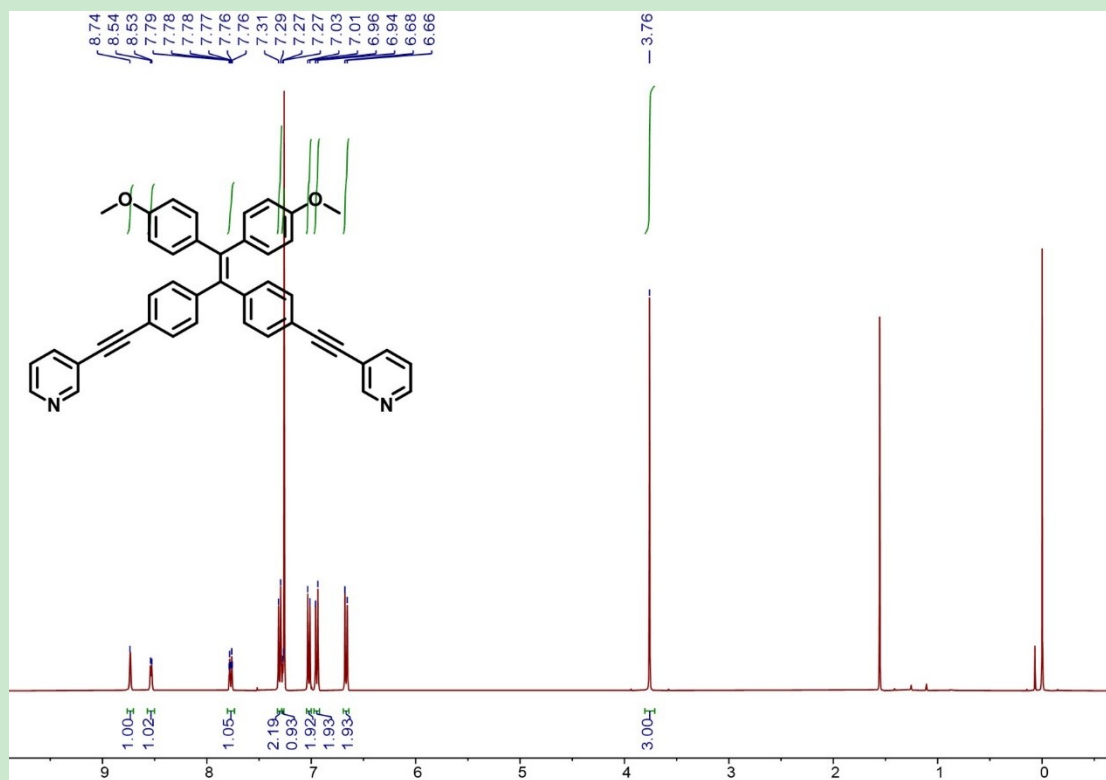

**Figure S9.** <sup>1</sup>H NMR spectra of ligand 1 (400 MHz, CDCl<sub>3</sub>).

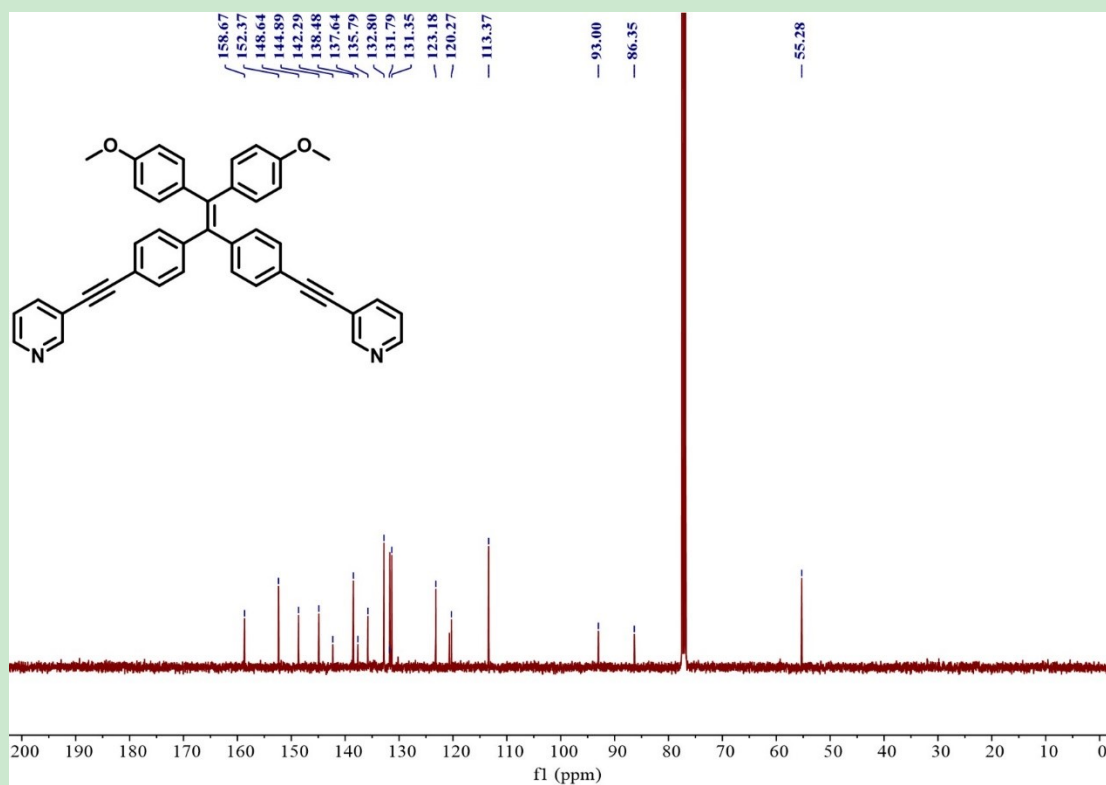

**Figure S10.** <sup>13</sup>C NMR spectra of ligand 1 (100 MHz, CDCl<sub>3</sub>).

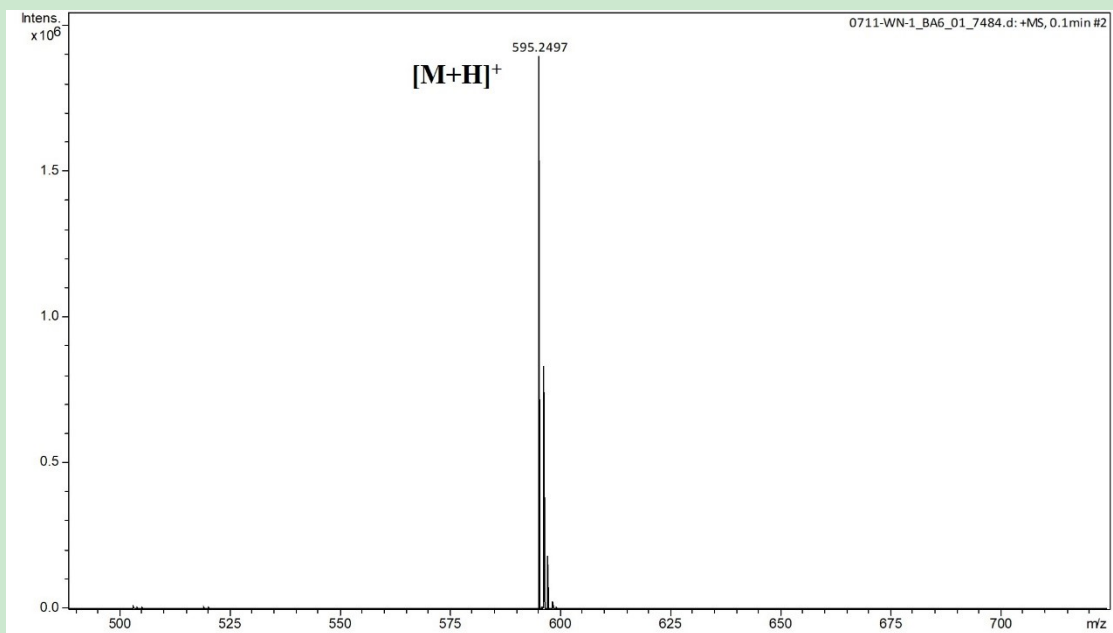

**Figure S11.** MS spectra of ligand 1.
